# Supplementary material for: CD27 expression and its association with clinical outcome in children and adults with pro-B acute lymphoblastic leukemia
Source: PubMed Central journal article supplement — Blood Cancer J. 2017 Jun 23;7(6):e575–. doi: 10.1038/bcj.2017.55 (PMC5520402; doi:10.1038/bcj.2017.55), 2017-06-23
Supplement: bcj201755x1.pdf [file bcj201755x1.pdf]

## **CD27 expression and its association with clinical outcome in children and adults with pro-B acute lymphoblastic leukemia**

### **Materials and Methods**

#### **Healthy donors and patient samples**

Healthy bone marrow cells were isolated from five adult (age 58-85 years) patients undergoing primary total hip arthroplasty at the Sahlgrenska University Hospital, Gothenburg, Sweden. The study was approved by the Regional Ethical Review Board in Gothenburg (627-14), and conducted in accordance with the Helsinki Declaration. All patients provided written informed consent. Six patients diagnosed with BCP-ALL during 2016 from the Affiliated Hospital of Guizhou Medical University (China) were included. Bone marrow samples from BCP-ALL patients were analyzed as part of routine diagnostics. The diagnosis was based on the WHO 2008 criteria <sup>1</sup>.

#### **Flow cytometry**

Healthy bone marrow samples were filtered using a 40µm filter (BD Biosciences), and thereafter stained with antibodies recognizing: CD27 (PE), CD19 (BV510), CD3 (APC-H7), CD34 (PerCP-Cy5.5), CD24 (PeCy7), CD38 (BV421), CD10 (APC), IgM (APC). BCP-ALL cells were stained with antibodies recognizing: CD27 (PE), CD19 (APC), CD45 (PerCP-Cy5.5), CD20 (APC) (BD Biosciences). The cells were acquired on a FACSVerse or FACSCantoII (BD Biosciences), and data were analyzed using FlowJo software (FlowJo, LLC, USA).

#### **Gene expression microarray data**

Gene expression microarray data of BCP-ALL and healthy B cells were gathered from published studies <sup>2-12</sup>, and downloaded from the Gene Expression Omnibus (Table S1). All gene expression microarray data are log<sub>2</sub> transformed and normalized using the Robust Multichip Average (RMA) method. To assess similarity of molecular signatures between pro-B cells (pro-B signature) and different *CD27*-clusters within BCP-ALL, gene set enrichment analysis (GSEA) was performed. The data were analyzed using Qlucore Omics Explorer 3.2 (Qlucore AB, Lund, Sweden).

#### **Analysis of survival and relapse data**

The clinical data from the high-risk pediatric patients (n=207) in data set GSE11877

and adult patients (n=187) in data set GSE34861 were collected from previous studies<sup>10,12</sup>. The “high-risk pediatric patients” in GSE11877 includes for instance children 8 years or older with high WBC, but excludes those with *BCR-ABL1*. Further details can be found at: <http://www.ped-onc.org/diseases/ALLtrials/9906.html>. The clinical data from pediatric patients (n=75) in data set GSE47051 were obtained from the Nordic Society of Paediatric Haematology and Oncology Registry.

Overall survival (OS) was estimated by the Kaplan-Meier method (Graph Pad Prism). Survival differences were assessed with the log-rank test. OS time was defined as the time from diagnosis until death or the date of last follow-up. Comparison of relapse data was determined with Fisher's exact test.

**Table S1.** Data sets used in this study

| GEO accession         | Sample    | Country     | Platform | Patient # | Clinical data available | Reference |
|-----------------------|-----------|-------------|----------|-----------|-------------------------|-----------|
| GSE45460              | Fetal BM  | South Korea | GPL6244  | 8         | No                      | 2         |
| GSE12995              | Pediatric | USA         | GPL96    | 175       | No                      | 3         |
| Blood 2003*           | Pediatric | USA         | GPL96    | 118       | No                      | 4         |
| GSE26281 <sup>#</sup> | Pediatric | USA         | GPL96    | 127       | No                      | 5         |
| GSE13425              | Pediatric | Netherlands | GPL96    | 154       | No                      | 6         |
| GSE13576              | Pediatric | Italy       | GPL570   | 197       | No                      | 7         |
| GSE33315              | Pediatric | USA         | GPL96    | 483       | No                      | 8         |
| GSE47051              | Pediatric | Sweden      | GPL570   | 75        | Yes                     | 9         |
| GSE11877 <sup>#</sup> | Pediatric | USA         | GPL570   | 207       | Yes                     | 10        |
| CCR 2005*             | Adult     | Italy       | GPL8300  | 95        | No                      | 11        |
| GSE34861              | Adult     | USA         | GPL15088 | 191       | Yes                     | 12        |

\* No GEO accession number, herein termed according to journal and year.

<sup>#</sup> *CRLF2*-rearranged already defined in data set

## References

- 1 Vardiman JW, Thiele J, Arber DA, Brunning RD, Borowitz MJ, Porwit A *et al.* The 2008 revision of the World Health Organization (WHO) classification of myeloid neoplasms and acute leukemia: rationale and important changes. *Blood* 2009; **114**, 937-951, doi:10.1182/blood-2009-03-209262.
- 2 Lee ST, Xiao Y, Muench MO, Xiao J, Fomin ME, Wiencke JK *et al.* A global DNA methylation and gene expression analysis of early human B-cell development reveals a demethylation signature and transcription factor network. *Nucleic Acids Res* 2012; **40**, 11339-11351, doi:10.1093/nar/gks957.
- 3 Mullighan CG, Su X, Zhang J, Radtke I, Phillips LA, Miller CB *et al.* Deletion of IKZF1 and prognosis in acute lymphoblastic leukemia. *New England Journal of Medicine* 2009; **360**, 470-480.
- 4 Ross ME, Zhou X, Song G, Shurtleff SA, Girtman K, Williams WK *et al.* Classification of pediatric acute lymphoblastic leukemia by gene expression profiling. *Blood* 2003; **102**, 2951-2959, doi:10.1182/blood-2003-01-0338.
- 5 Figueroa ME, Chen SC, Andersson AK, Phillips LA, Li Y, Sotzen J *et al.* Integrated genetic and epigenetic analysis of childhood acute lymphoblastic leukemia. *J Clin Invest* 2013; **123**, 3099-3111, doi:10.1172/JCI66203.
- 6 Den Boer ML, van Slegtenhorst M, De Menezes RX, Cheok MH, Buijs-Gladdines JG, Peters ST *et al.* A subtype of childhood acute lymphoblastic leukaemia with poor treatment outcome: a genome-wide classification study. *Lancet Oncol* 2009; **10**, 125-134, doi:10.1016/S1470-2045(08)70339-5.
- 7 Meyer LH, Eckhoff SM, Queudeville M, Kraus JM, Giordan M, Stursberg J *et al.* Early relapse in ALL is identified by time to leukemia in NOD/SCID mice and is characterized by a gene signature involving survival pathways. *Cancer cell* 2011; **19**, 206-217, doi:10.1016/j.ccr.2010.11.014.
- 8 Zhang J, Ding L, Holmfeldt L, Wu G, Heatley SL, Payne-Turner D *et al.* The genetic basis of early T-cell precursor acute lymphoblastic leukaemia. *Nature* 2012; **481**, 157-163, doi:10.1038/nature10725.
- 9 Nordlund J, Backlin CL, Wahlberg P, Busche S, Berglund EC, Eloranta ML *et al.* Genome-wide signatures of differential DNA methylation in pediatric acute lymphoblastic leukemia. *Genome Biol* 2013; **14**, r105, doi:10.1186/gb-2013-14-9-r105.
- 10 Harvey RC, Mullighan CG, Chen IM, Wharton W, Mikhail FM, Carroll AJ *et al.* Rearrangement of CRLF2 is associated with mutation of JAK kinases, alteration of IKZF1, Hispanic/Latino ethnicity, and a poor outcome in pediatric B-progenitor acute lymphoblastic leukemia. *Blood* 2010; **115**, 5312-5321, doi:10.1182/blood-2009-09-245944.
- 11 Chiaretti S, Li X, Gentleman R, Vitale A, Wang KS, Mandelli F *et al.* Gene expression profiles of B-lineage adult acute lymphocytic leukemia reveal genetic patterns that identify lineage derivation and distinct mechanisms of transformation. *Clin Cancer Res* 2005; **11**, 7209-7219, doi:10.1158/1078-0432.CCR-04-2165.
- 12 Geng H, Brennan S, Milne TA, Chen WY, Li Y, Hurtz C *et al.* Integrative epigenomic analysis identifies biomarkers and therapeutic targets in adult B-acute lymphoblastic leukemia. *Cancer Discov* 2012; **2**, 1004-1023, doi:10.1158/2159-8290.CD-12-0208.

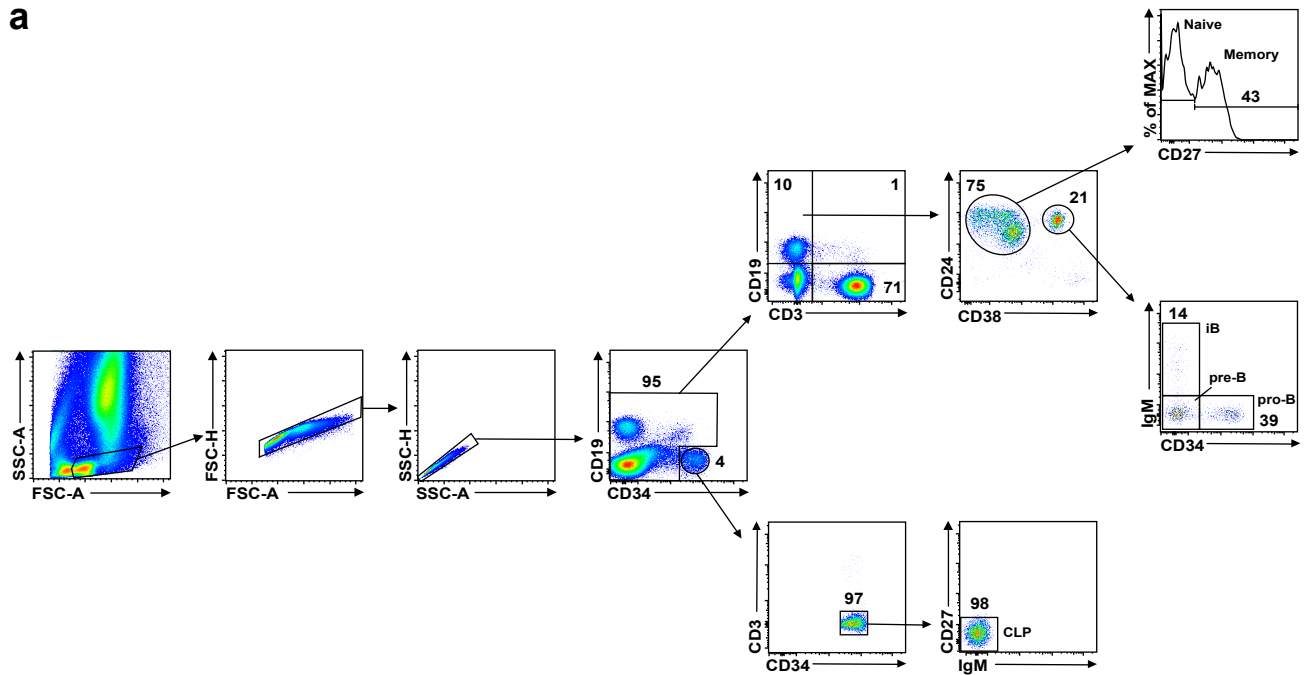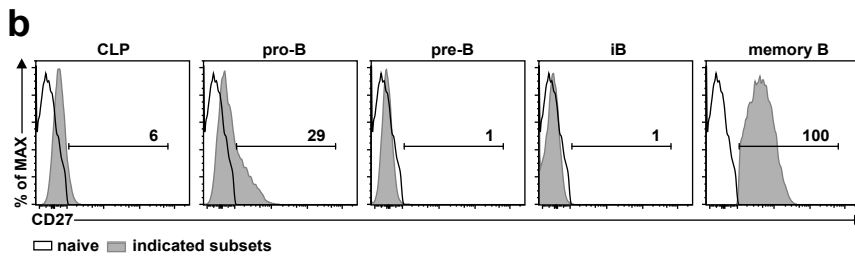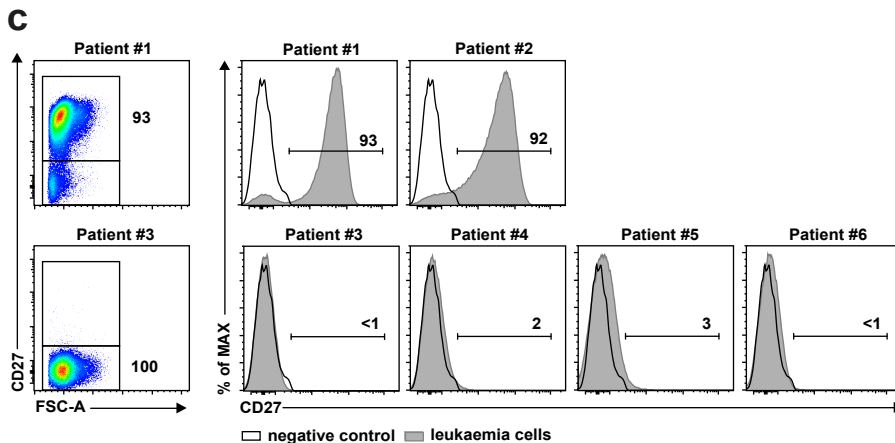

**Supplementary Figure S1.** (a) Gating strategy for indicated populations in healthy bone marrow, with histogram showing naïve (CD27<sup>-</sup>) and memory (CD27<sup>+</sup>) B cells. CLP, CD19<sup>+</sup>CD34<sup>+</sup>CD3<sup>-</sup>CD10<sup>-</sup>IgM<sup>-</sup>; pro-B, CD19<sup>+</sup>CD3<sup>-</sup>CD24<sup>+</sup>CD38<sup>+</sup>CD34<sup>+</sup>CD10<sup>+</sup>IgM<sup>-</sup>; pre-B, CD19<sup>+</sup>CD3<sup>-</sup>CD24<sup>+</sup>CD38<sup>+</sup>CD34<sup>-</sup>CD10<sup>+</sup>IgM<sup>-</sup>; iB, CD19<sup>+</sup>CD3<sup>-</sup>CD24<sup>+</sup>CD38<sup>+</sup>CD34<sup>-</sup>CD10<sup>+</sup>IgM<sup>+</sup>; naïve B, CD19<sup>+</sup>CD3<sup>-</sup>CD24<sup>+</sup>CD38<sup>+</sup>CD27<sup>-</sup>; memory B, CD19<sup>+</sup>CD3<sup>-</sup>CD24<sup>+</sup>CD38<sup>+</sup>CD27<sup>+</sup>. (b and c) Gating strategy for CD27 surface expression on (b) indicated BM populations and (c) leukemia samples (CD19<sup>+</sup>). CLP, common lymphoid progenitor; iB, immature B.

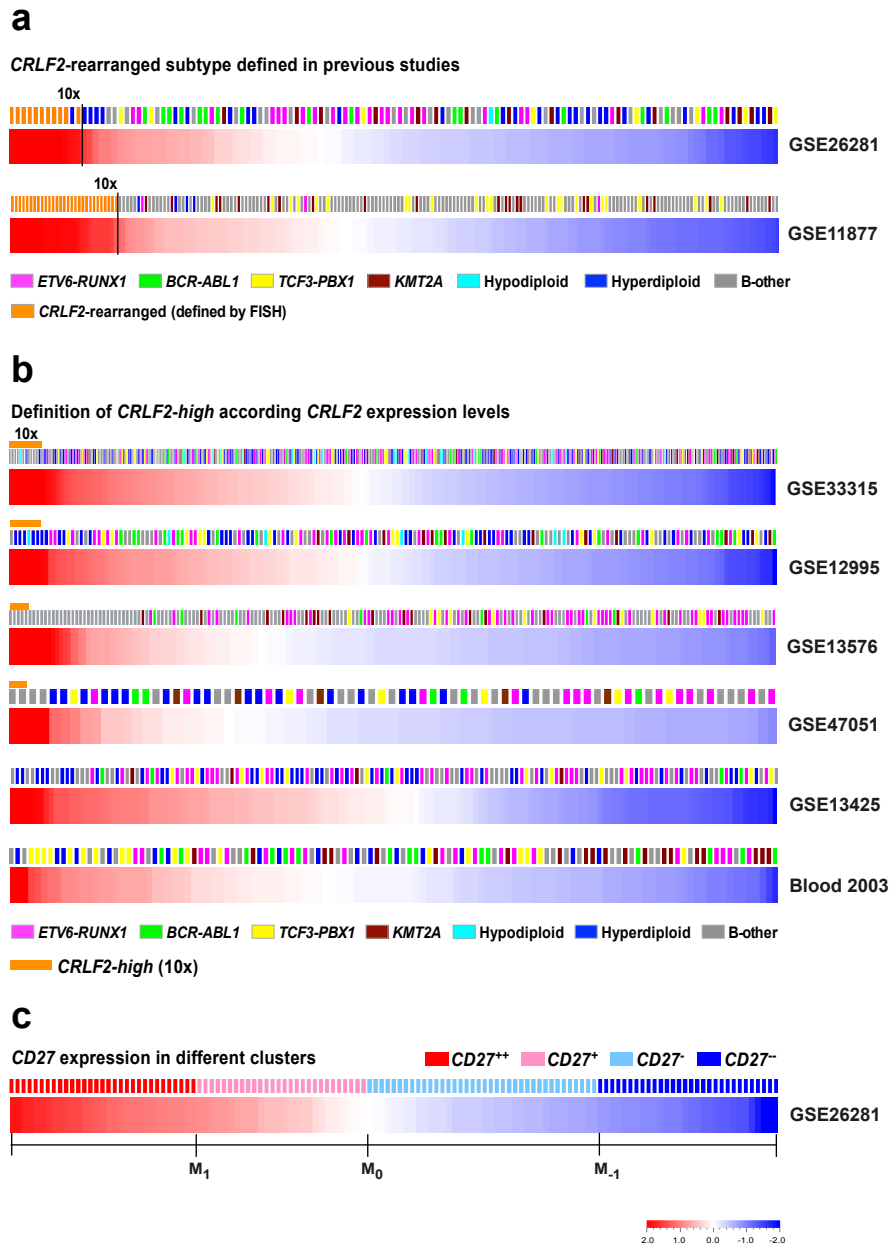

**Supplementary Figure S2.** Definition of *CRLF2-high* and *CD27* clusters in BCP-ALL data sets. (a and b) Heat maps show *CRLF2* mRNA expression in indicated BCP-ALL data sets (Table S1). *CRLF2*-rearranged subtype (a) previously defined (b) not defined. (a) Vertical lines indicate *CRLF2* expression 10-fold above the median level. (b) *CRLF2* expression 10-fold above the median level was used as cut-off to define the subtype herein termed *CRLF2-high* (orange bar above samples). (c) Heat map shows the definition of *CD27* clusters in one of the analyzed BCP-ALL data sets. Samples were classified into four groups according to *CD27* expression levels (*CD27*<sup>++</sup>, *CD27*<sup>+</sup>, *CD27*<sup>-</sup> and *CD27*<sup>--</sup>), where M<sub>0</sub> is the mean expression level of *CD27* in all samples. *CD27*<sup>++</sup> (>M<sub>1</sub>), *CD27*<sup>+</sup> (<M<sub>1</sub> to >M<sub>0</sub>), *CD27*<sup>-</sup> (<M<sub>0</sub> to >M<sub>-1</sub>), *CD27*<sup>--</sup> (<M<sub>-1</sub>).

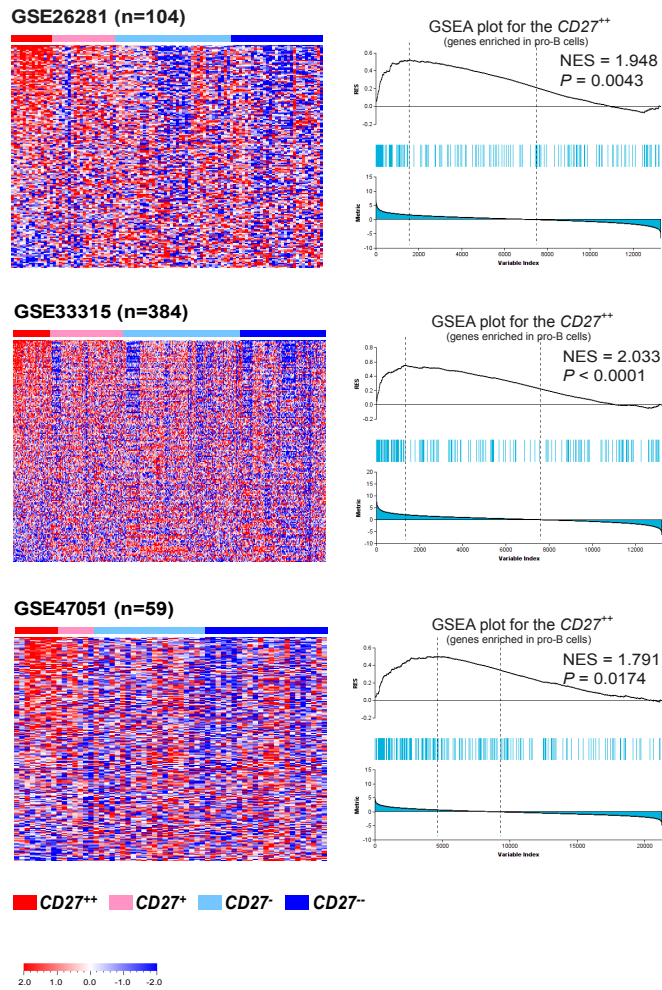

**Supplementary Figure S3.** Molecular signature between pro-B cells and  $CD27^{++}$  BCP-ALL. Heat map (left) and GSEA enrichment plots (right) reveal a pro-B molecular signature in  $CD27^{++}$  indicated BCP-ALL data sets.

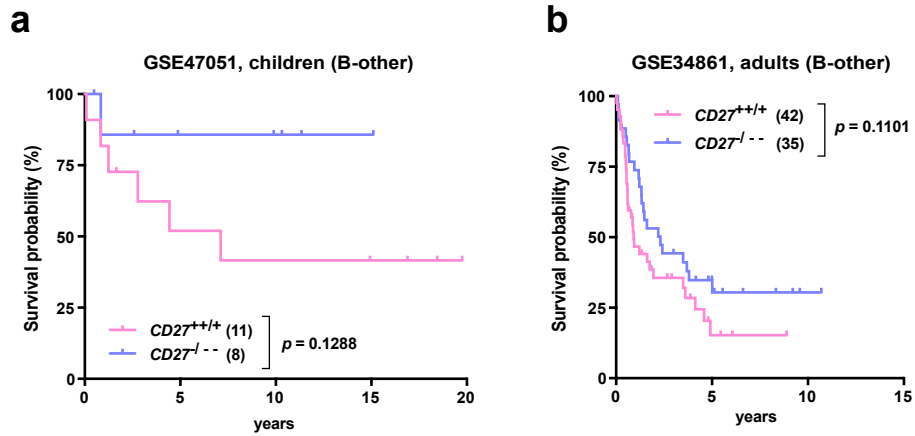

**Supplementary Figure S4.** Clinical relevance of *CD27* mRNA levels in patients with B-other BCP-ALL. (a and b) Kaplan-Meier Log-rank survival analysis was used to compare survival of patients within the indicated *CD27* clusters. (a) Pediatric cohort GSE47051, and (b) adult cohort GSE34861.  $CD27^{+/+/+}$ ,  $CD27^{+/+}$  and  $CD27^{+}$ ;  $CD27^{-/-}$ ,  $CD27^{-}$  and  $CD27^{-}$ .
